# Supplementary material
Source: Springer Nature journal article supplement (https://www.springermedizin.de/resource/supplementary/13020_2013_204_MOESM1_ESM.pdf/9641252)

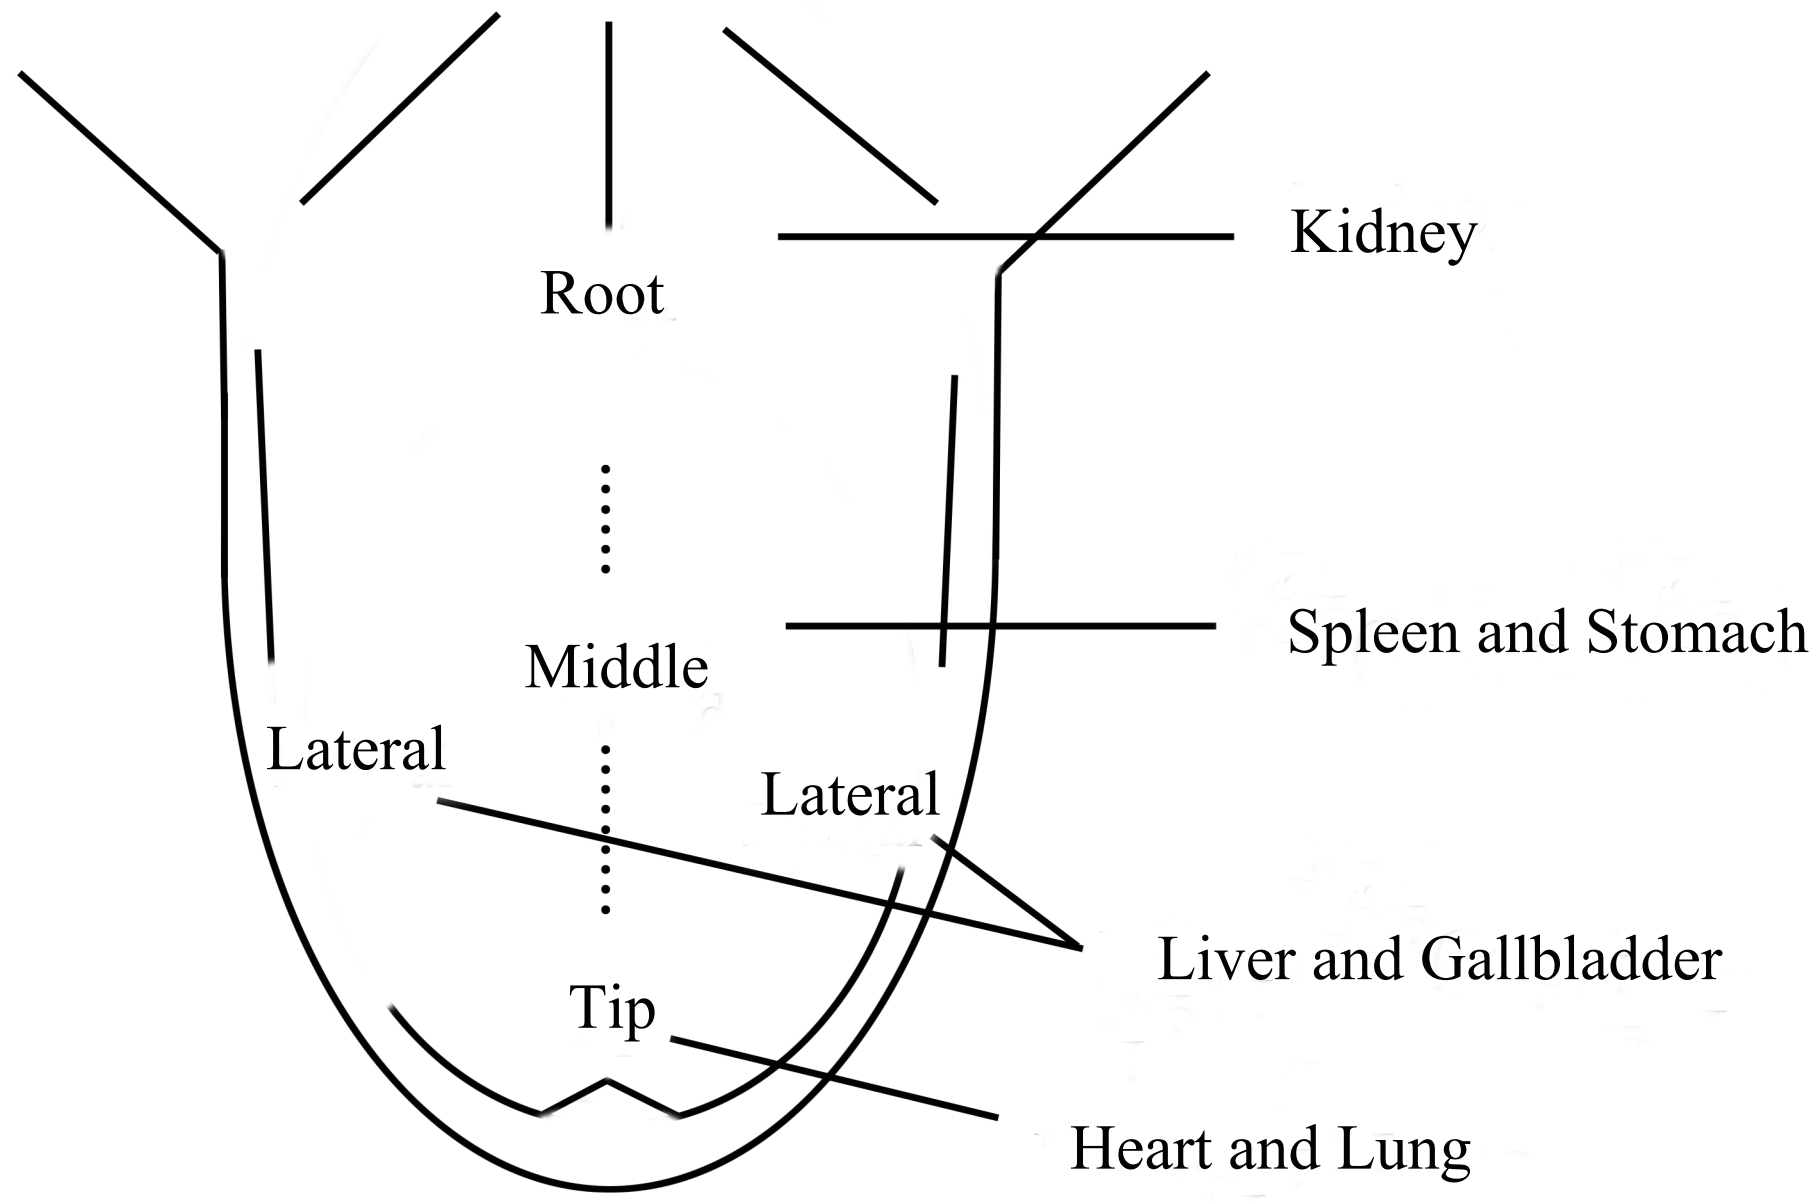

Supplement: MOESM1 [file 9641252]
